# Supplementary material for: Wearables for Biomechanical Performance Optimization and Risk Assessment in Industrial and Sports Applications
Source: MDPI journal article supplement (doi:10.3390/bioengineering9010033), 2022-01-13
Supplement: s1 [file s1]

Review

# Wearables for Biomechanical Performance Optimization and Risk Assessment in Industrial and Sports Applications

Sam McDevitt <sup>1</sup>, Haley Hernandez <sup>1</sup>, Jamison Hicks <sup>2</sup>, Russell Lowell <sup>3</sup>, Hamza Bentahaikt <sup>4</sup>, Reuben Burch <sup>2,5</sup>, John Ball <sup>1,5</sup>, Harish Chander <sup>3,5</sup>, Charles Freeman <sup>6,\*</sup>, Courtney Taylor <sup>7</sup> and Brock Anderson <sup>8</sup>

Supplementary Materials:

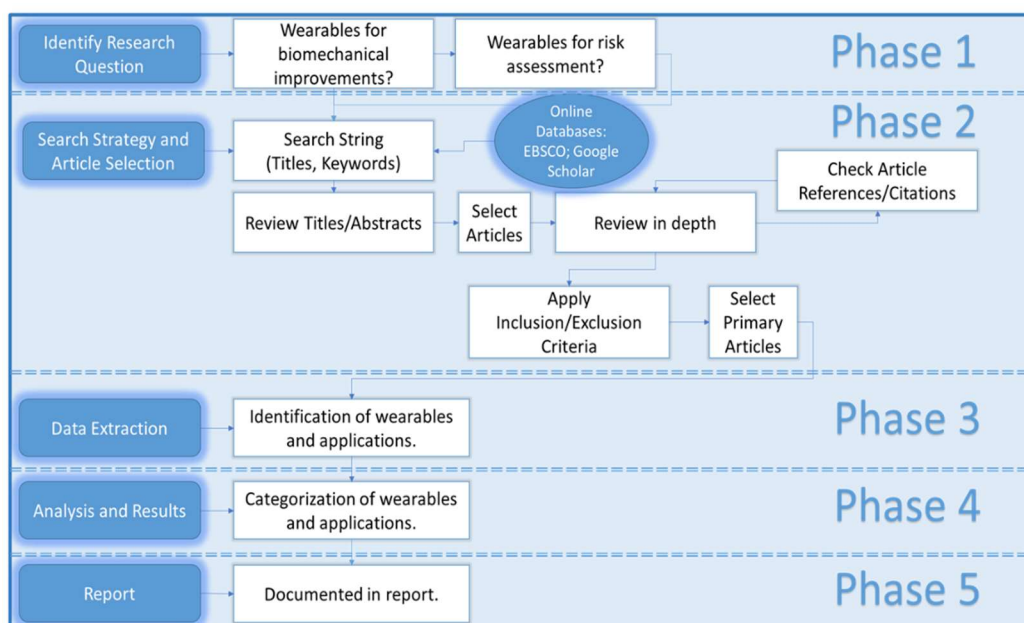

**Figure S1.** The methods followed to identify research question, search strategy and article selection, data extraction, analysis and results and reporting.
